# Supplementary material for: Azetidinium lead iodide for perovskite solar cells
Source: Royal Society of Chemistry journal article supplement (doi:10.1039/c7ta07545f), 2017-01-01
Supplement: c7ta07545f1.pdf [file c7ta07545f1.pdf]

## Azetidinium Lead Iodide for Perovskite Solar Cells

*S. R. Pering<sup>a</sup>, W. Deng<sup>a</sup>, J. R. Troughton<sup>c</sup>, D. Ghosh<sup>e</sup>, R. G. Niemann<sup>a</sup>, F. Brivio<sup>a</sup>, P. S. Kubiak<sup>a,b</sup>, F. E. Jeffrey<sup>d</sup>, A.B. Walker<sup>e</sup>, M.S. Islam<sup>a,d</sup>, T. M. Watson<sup>c</sup>, P.R. Raithby<sup>a</sup>, A.L. Johnson<sup>a,d</sup>, S. E. Lewis<sup>a,d</sup>, & P. J. Cameron<sup>a,d</sup>*

*<sup>a</sup>: Department of Chemistry, University of Bath, Claverton Down, Bath, BA2 7AY, UK*

*<sup>b</sup>: Centre for Doctoral Training in New and Sustainable Photovoltaics, University of Liverpool*

*<sup>c</sup>: SPECIFIC, Swansea University College of Engineering, Bay Campus, Swansea, SA1 8EN, UK*

*<sup>d</sup>: Centre for Sustainable Chemical Technologies, University of Bath, Claverton Down, Bath, BA2 7AY, UK*

*<sup>e</sup>: Department of Physics, University of Bath, Claverton Down, Bath, BA2 7AY, UK*

## Experimental

### 4.1. Computational calculations

#### 4.1.1. Dipole calculations

The calculated dipoles have been obtained using the NWChem code.<sup>[39]</sup> The initial input obtained by geometrical intuition has been optimized. To express the wavefunction we used the cc-pVTZ basis set provided within the package and the as exchange correlation functional we used the B3lyp. The obtained values are in good agreement with other reports in literature.<sup>[40,41]</sup>

#### 4.1.2. DFT calculations

Density functional theory (DFT) based calculations were performed in this study (using the CP2K code<sup>[42]</sup>). The parent tetragonal phase of MAPbI<sub>3</sub> lattice was modelled by a large 3x3x2 supercell (containing 48 A-site cations), which allowed us to simulate the small concentration of Az cations (up to 5%) The calculations employed an auxiliary plane wave basis set,<sup>[43]</sup> an energy cut-off of 350 Ry, an analytical dual-space pseudopotential as implemented by Goedecker, Teter, and Hutter (GTH),<sup>[44]</sup> and the GGA of Perdew-Burke-Ernzerhof (PBEsol).<sup>[45]</sup> Additionally, we apply van der Waals interactions, as prescribed by Grimme.<sup>[46]</sup> To obtain the ground state geometry, we relax all atoms till the interatomic forces become less than 0.02eV/Å. To calculate the substitution energy ( $E_{\text{subs}}$ ), the following was been used,

$$E_{\text{subs}} = (E_{\text{MA}(1-x)\text{AzXPbI}_3^+}) - (E_{\text{MAPbI}_3} + xE_{\text{Az}})$$

where  $E_{\text{MA}(1-x)\text{AzXPbI}_3}$ ,  $E_{\text{MAPbI}_3}$ ,  $E_{\text{MA}}$  and  $E_{\text{Az}}$  were the total energies of the mixed cation lattice, parent lattice and  $\text{MA}^+$  and  $\text{Az}^+$  cations, respectively.

#### 4.2. Azetidinium iodide preparation

5 ml of Azetidine (Alfa Aesar) at 0 °C had 55 mL hydroiodic acid (Sigma) added to it under argon atmosphere (**Caution! Exotherm**). The ice bath was subsequently removed, and the solution was stirred for one hour. The solution was then left on a rotary evaporator until dry, leaving a bright orange solid. This was washed with diethyl ether to remove the iodine, and recrystallized in isopropanol, leaving white needle-like crystals. The identity of azetidinium iodide (AzI) was confirmed by  $^1\text{H}$  NMR (Figure S1): (300 MHz,  $\text{D}_2\text{O}$ ,  $\delta$ ): 2.46 (quin,  $J = 8.29$  Hz, 2 H)  $\delta$  4.04 (t,  $J = 8.5$  Hz, 4 H)

#### 4.3. Crystal formation

0.1 mmol  $\text{PbI}_2$  and AzI were dissolved in 1 mL  $N,N$ -dimethylformamide, and single crystals were grown by the solvent evaporation method.

#### 4.4. Film deposition

For optical and structural measurements the perovskite films were deposited on to microscope glass following a method by Zheng *et al.*<sup>[35]</sup> Before film deposition, the substrates were cleaned by sonication in 2% Hellmanex solution in water, followed by deionised water, acetone and isopropanol at 90 °C. Lastly they were treated with UV/Ozone for 20 minutes. 100  $\mu\text{L}$  of a 1 M solution of  $\text{PbI}_2$  (Sigma-Aldrich) in  $N,N$ -dimethylformamide was spin-coated at 2000 rpm for 60 seconds, followed immediately by 100  $\mu\text{L}$  of isopropanol spun at the same rate. The resulting  $\text{PbI}_2$  film was dried at 60 °C for 30 minutes. Solutions containing

varying mole percentages of azetidinium iodide compared to methylammonium iodide were prepared in isopropanol, with a concentration of 20 mgml<sup>-1</sup>. 100 µL of these solutions were pipetted onto the PbI<sub>2</sub> films, and spun for 60 seconds at 2000 rpm. The perovskite films were annealed at 100 °C for 20 minutes.

#### *4.5. Solar cell fabrication*

Pre-etched FTO glass (Kintek) was cleaned in 2% Hellmanex solution in water, followed by deionised water, acetone and isopropanol. A compact TiO<sub>2</sub> layer was deposited by spray pyrolysis. A hand held atomiser was used to spray a solution of 10 vol% solution of titanium isopropoxide (bisacetylacetonate) (Sigma-Aldrich) in isopropanol onto the substrates, which were kept at 550 °C for the procedure, and sintered for 30 minutes at the same temperature. A mesoporous layer consisting of a 2:7 mixture of 30 NR-D TiO<sub>2</sub> paste (Dyesol) in ethanol was spun onto the compact layer with a further 30 minute sintering step at 550 °C. After cooling, to improve conductivity a 0.1 M solution of Li-TFSI (Sigma) solution was spin-coated at 3000 rpm for 10 seconds and the substrates were then re-sintered at 550 °C for 30 minutes. Perovskite deposition was performed in a nitrogen filled glove box. A two-step dip-coating method was used to fabricate the solar cells. 1M PbI<sub>2</sub> in DMF was kept at 70 °C for spin-coating. 100 µL of PbI<sub>2</sub> solution was spin-coated at 6500 rpm for 30s, then dried at 100 °C for 30 minutes. A 5 minute dipping step in the MAI or mixed MAI/AzI in IPA solution (10 mgml<sup>-1</sup>, AzI fractions in mol% with respect to MAI). The films were annealed at 100 °C for 1 hour.

The hole transport layer solution consisted of 85 mgml<sup>-1</sup> Spiro-OMeTAD (Ossila) in chlorobenzene, with additives of: 30 µLml<sup>-1</sup> *t*-butyl pyridine (Sigma), 20 µLml<sup>-1</sup> of 520 mgmL<sup>-1</sup> Li-TFSI in acetonitrile and 30 µgmL<sup>-1</sup> FK209-TFSI solution. This was spin-coated onto the perovskite at 4000 rpm for 30 seconds.

To establish the contacts, 2 mm of perovskite was removed from the centre of the substrate. 100 nm of gold (Kurt J Lesker) was deposited by thermal evaporation.

#### *4.6. SCXRD, PXRD*

Crystal X-ray diffraction was performed on an Agilent Technologies EOS S2 Supernova, using a Cu X-ray source.

A Bruker axs D8 advance powder x-ray diffractometer with a Cu K $\alpha$  source and Ge monochromator was used for Powder X-ray diffraction. Measurements were taken from  $2\theta$  values of 5 ° to 80 °.

#### *4.7. UV/vis spectroscopy*

Thin film optical Transmission and Reflectance measurements were performed on a Perkin-Elmer Lambda 750S UV/Vis spectrometer, from 1000 nm to 250 nm. Absorption was calculated as incident light– (transmission + reflectance).

#### *4.8. Raman spectroscopy*

Raman measurements were performed with a Renishaw in via Reflex microRaman spectrometer equipped with solid state lasers emitting at 514 and 785 nm with a resolution of  $< 2 \text{ cm}^{-1}$ . The laser beam was focused with a x50 magnification lens, giving a laser spot size of about 1  $\mu\text{m}$  in diameter. Rayleigh scattering was rejected with a 110  $\text{cm}^{-1}$  cutoff dielectric edge filter. The AzI sample was measured with a 514 nm laser and the orange AzPI with the 785 nm laser in order to avoid resonant effects in the sample. All measurements were performed in air and with different laser powers to ensure that the laser probe did not induce damage or changes in the sample

#### *4.9. Electrochemical measurements*

An Autolab potentiostat/galvanostat was used for solution based electrochemistry, using an Ag/AgCl reference electrode and a platinum counter electrode. 0.1 mol azetidinium iodide in

isopropanol was used as the electrolyte. For Mott-Schottky measurements the frequency was 27 Hz and the voltage was swept stepwise from -0.1 to 0.75 V vs Ag/AgCl.

#### *4.10. J-V curves*

*J-V* curves were measured using a Keithley 2601A potentiostat, under 1 Sun intensity and at AM 1.5. The cell was swept at  $100 \text{ mVs}^{-1}$  from 1.1 V to -0.1 V and back to 1.1 V. The 8 pixels with a  $0.1 \text{ cm}^2$  active area (obtained using a mask) were measured independently. A Newport Oriel 91150-KG5 reference cell with a KG5 filter was used for instrument calibration.

EQE measurements were taken in 10 nm steps from 380-850 nm.

#### *4.11. Scanning Electron Microscopy*

SEM images were taken on a JEOL SEM 6480LV, at an acceleration voltage of 10kV.

#### *4.12 Atomic Force Microscopy*

AFM images were taken on a Nanosurf easyscan 2 FlexAFM system in dynamic mode using a force of 20 nN. A ContAl-G Tip was used for measurements

## Supporting Information

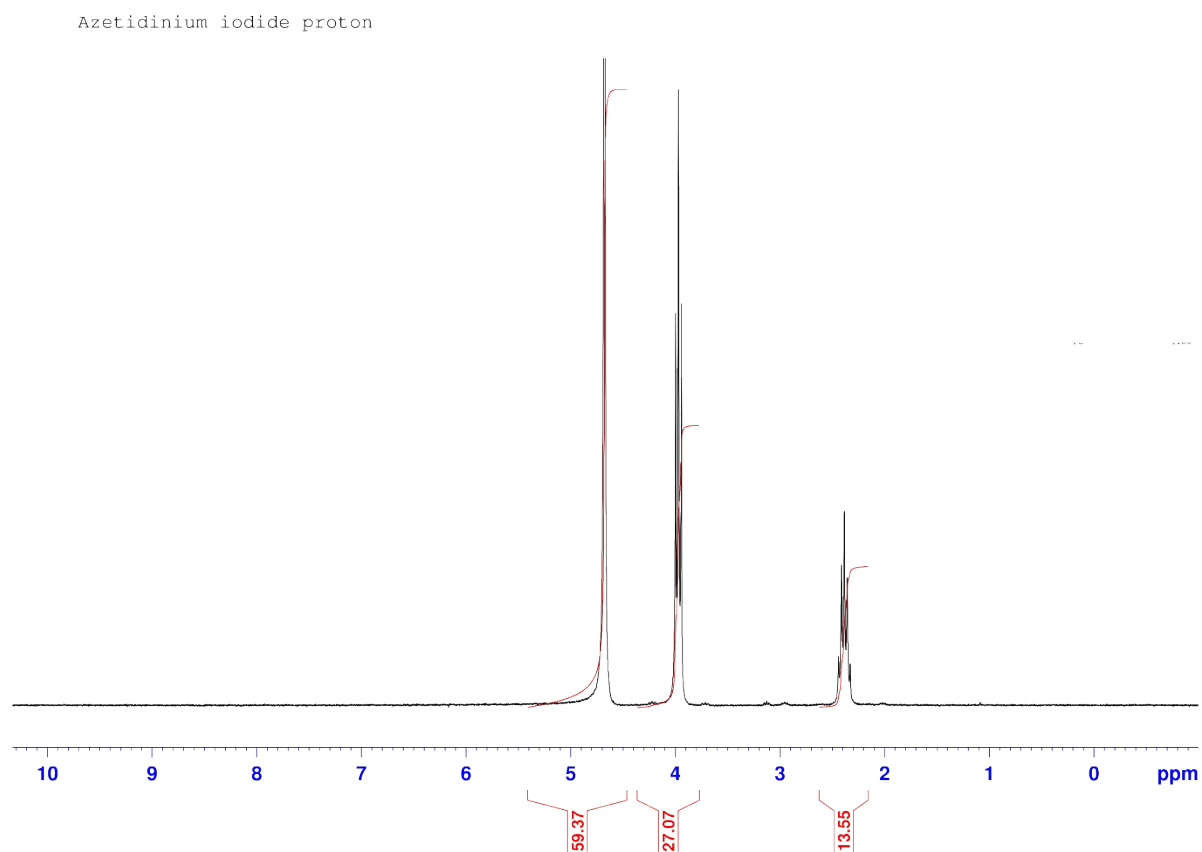

**Figure S1:** Azetidinium Iodide  $^1\text{H}$  NMR Spectrum (Taken in  $\text{D}_2\text{O}$  on a 300 MHz Spectrometer)

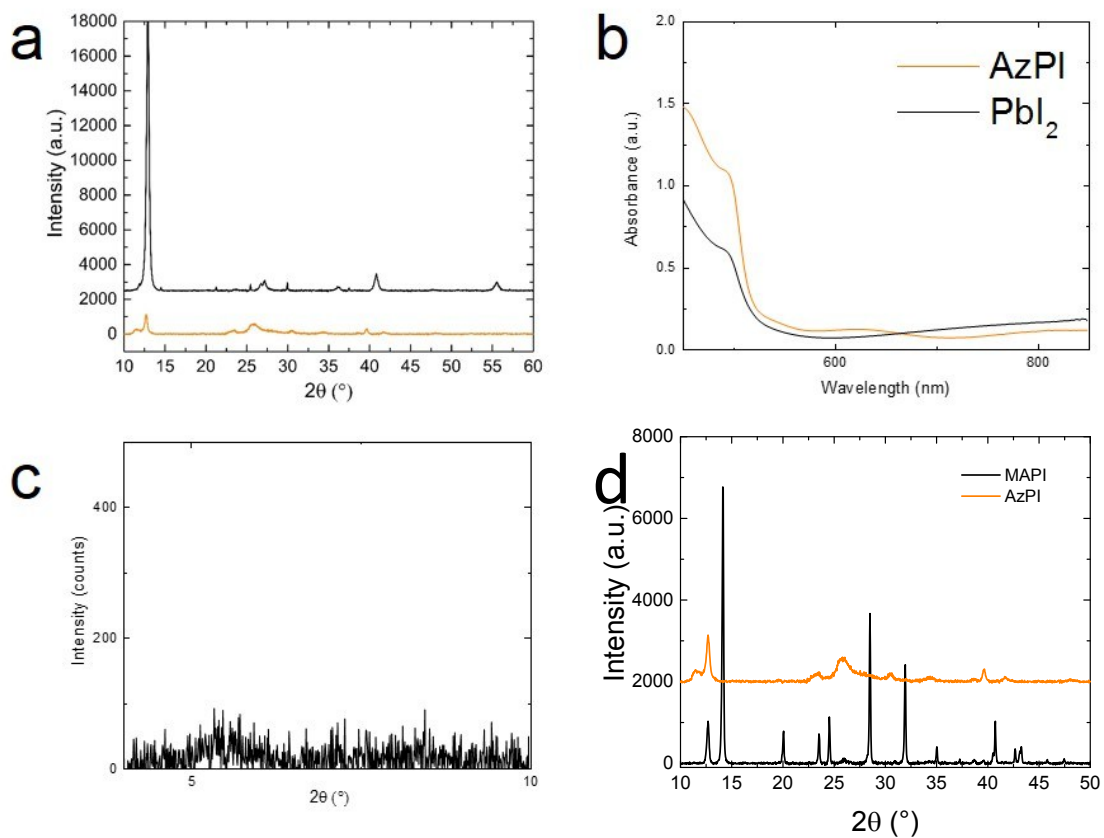

**Figure S2:** A comparison of AzPI to PbI<sub>2</sub> and MAPI (a) XRD of PbI<sub>2</sub> (black) and AzPI (orange), (b) UV/Vis of PbI<sub>2</sub> (black) and AzPI (orange) (c) low angle XRD of AzPI, and (d) MAPI (black) and AzPI (orange) XRD plots



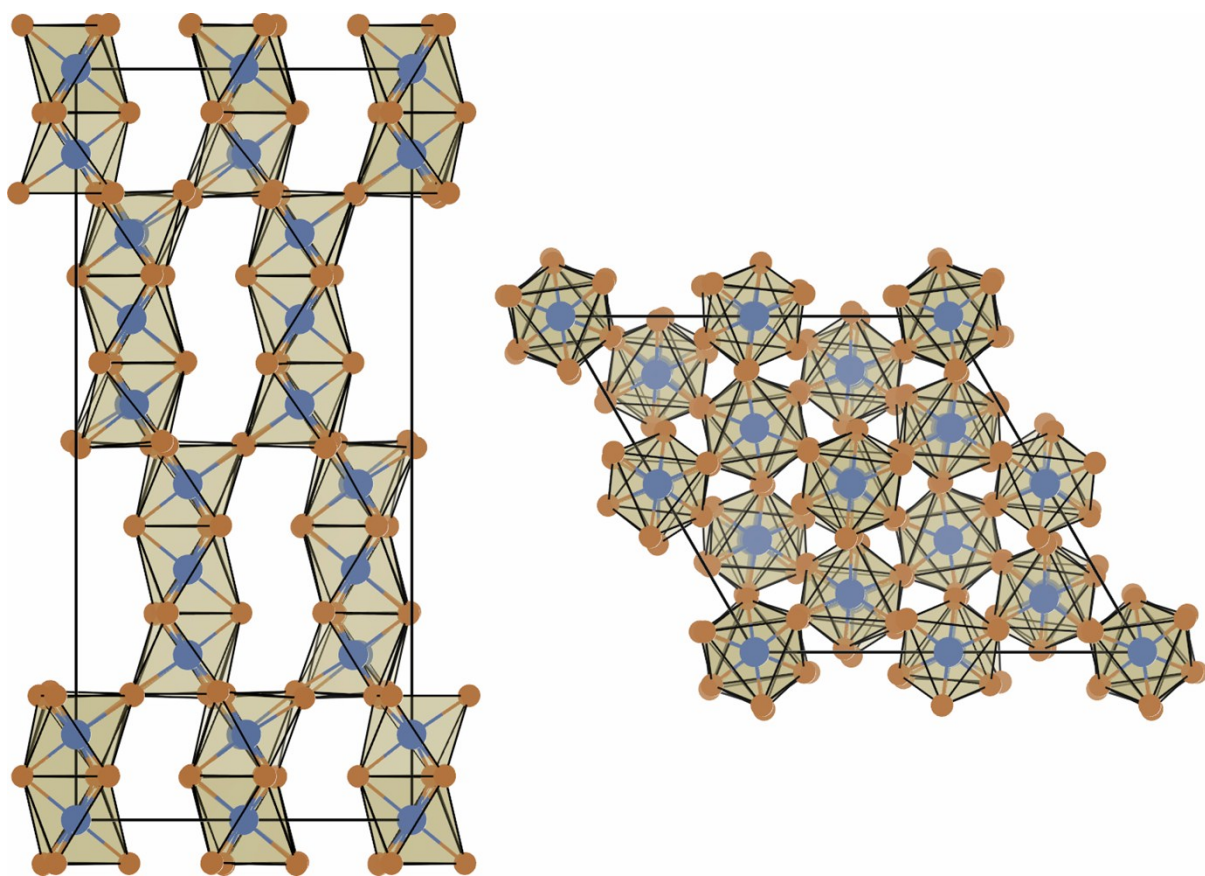

**Figure S3:**  $\text{PbI}_2$  skeleton suggested by SCXRD – it should be stressed that the degree of twinning was severe.

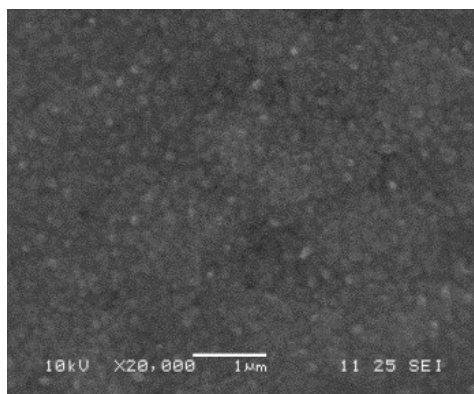

**Figure S4:** SEM image of an AzPI film

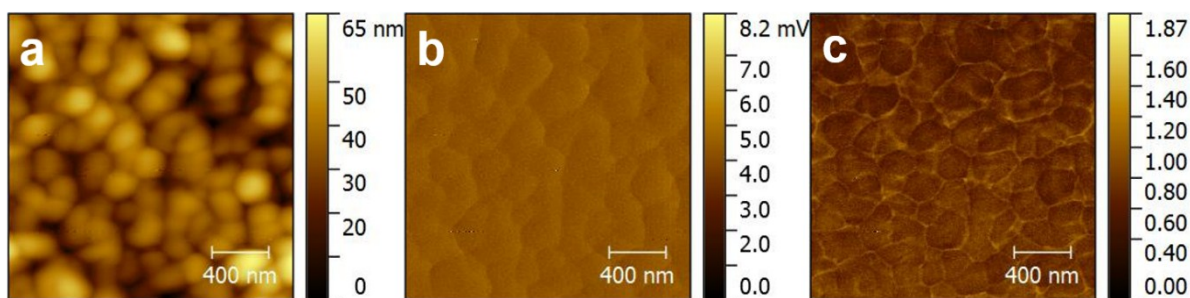

**Figure S5** AFM Images of an AzPI film: (a) z-axis, (b) amplitude and (c) phase

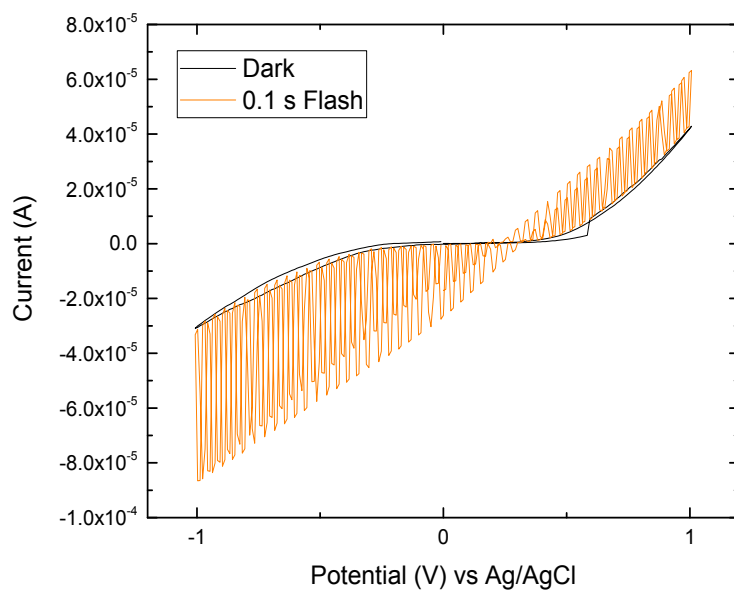

**Figure S6:** Chopped photocurrent measurement of AzPI on FTO, in 0.1 M AzI in IPA electrolyte, with Pt counter electrode and Ag/AgCl reference.

**Table S1.** Comparison of all measured Raman modes of AzPbI<sub>3</sub>, AzI and Az with provisional peak assignment.

| Az (DFT) | AzI  | rel. shift | AzPI | Assignment      |                           |
|----------|------|------------|------|-----------------|---------------------------|
| 361      |      |            |      | v <sub>1</sub>  | Ring pucker               |
|          |      |            | 693  | v <sub>2</sub>  | N-H bend (in plane)       |
| 808      | 785  | ↓ 15       | 770  | v <sub>3</sub>  | Ring deform               |
|          | 883  | ↓ 8        | 875  | v <sub>4</sub>  | 2-CH <sub>2</sub> twist   |
|          | 911  | ↓ 12       | 899  | v <sub>5</sub>  | 2-CH <sub>2</sub> rock    |
| 961      | 956  | ↓ 5        | 951  | v <sub>6</sub>  | 1-CH <sub>2</sub> rock    |
| 1009     | 1012 | ↓ 4        | 1008 | v <sub>7</sub>  | 2-CH <sub>2</sub> rock    |
|          | 1217 |            |      | v <sub>8</sub>  | 1-CH <sub>2</sub> wag     |
| 1254     | 1245 | ↑ 7        | 1252 | v <sub>9</sub>  | 1-CH <sub>2</sub> twist   |
| 1313     | 1283 | ↓ 6        | 1277 | v <sub>10</sub> | 2-CH <sub>2</sub> twist   |
| 1385     | 1302 |            |      | v <sub>11</sub> | 1-CH <sub>2</sub> twist   |
| 1452     | 1455 |            |      | v <sub>12</sub> | 1-CH <sub>2</sub> wag     |
| 1534     | 1511 | ↓ 61       | 1450 | v <sub>13</sub> | NH <sub>2</sub> wag       |
| 1655     | 1582 |            |      | v <sub>14</sub> | 2-CH <sub>2</sub> scissor |
| 2982     | 2980 | ↓ 8        | 2972 | v <sub>15</sub> | 1-C-H stretch             |
| 3020     | 3019 |            |      | v <sub>16</sub> | 2-C-H-stretch             |

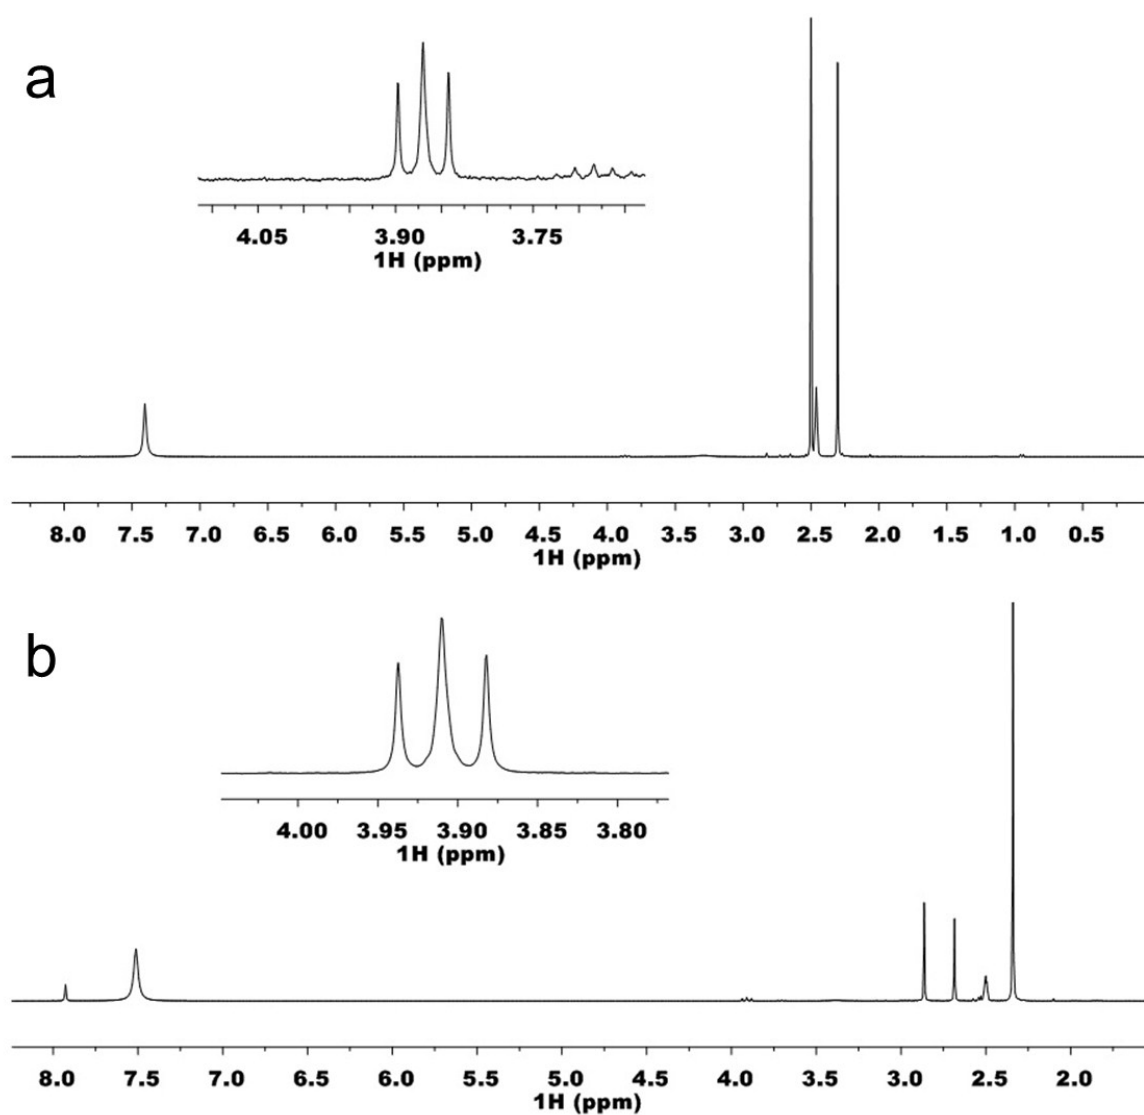

**Figure S7:**  $^1\text{H}$  NMR Spectrum (Taken in DMSO- $d_6$  on a 300 MHz Spectrometer) for: a) 1 mol% AzMAPI, and b) 5 mol%, both with the Azetidinium peak at  $\delta$  3.9 inset.

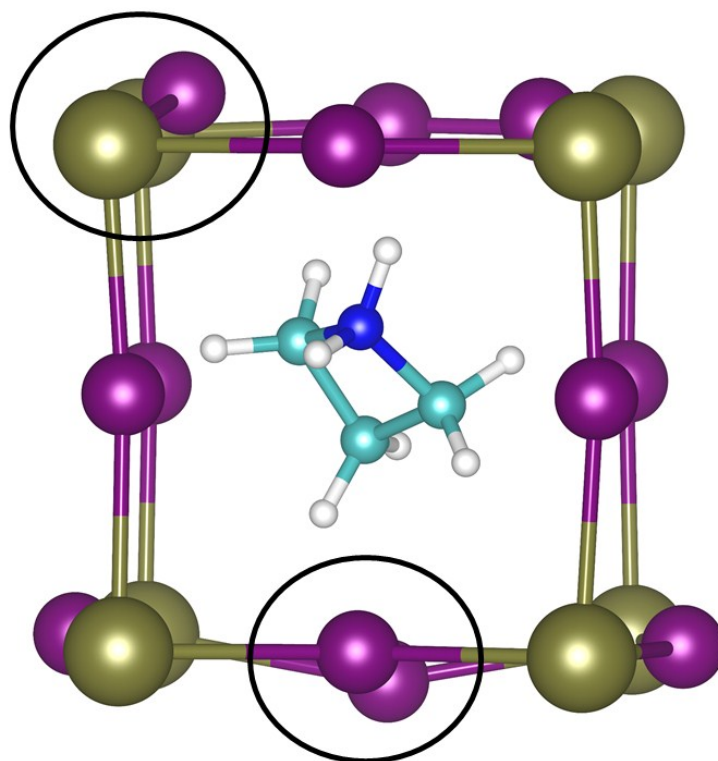

**Fig S8.** The optimized geometry of Pb/I lattices near to Az<sup>+</sup> cations. The local lattice distortion of Pb/I frame due to presence of Az<sup>+</sup> cation can be evidently seen and further marked by the black circles.

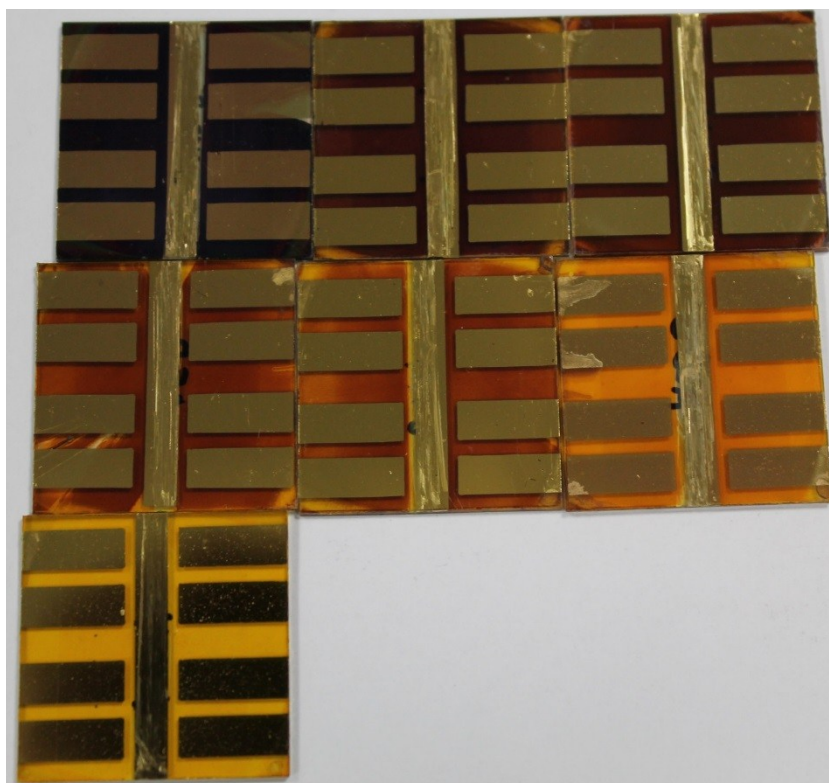

**Fig. S9:** A photograph of the MAPI/AzMAPI solar cell, from left to right: (top) MAPI, A1, A2 (middle) A5, A10, A25 (bottom), AzPI

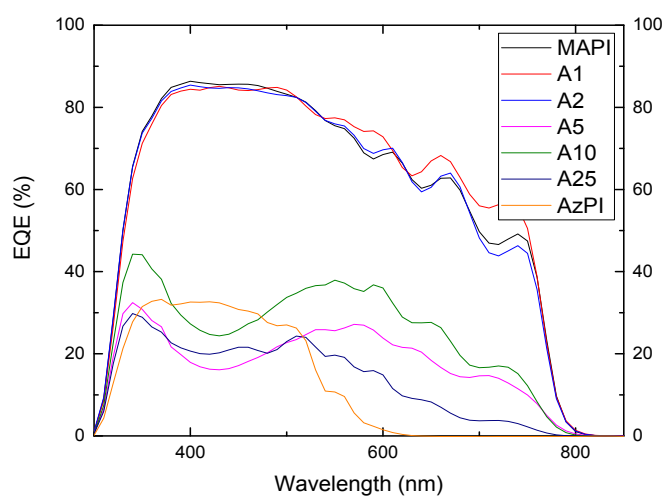

**Fig. S10:** EQE measurements for the best performing pixels for each mixture of MAPI, AzMAPI or AzPI

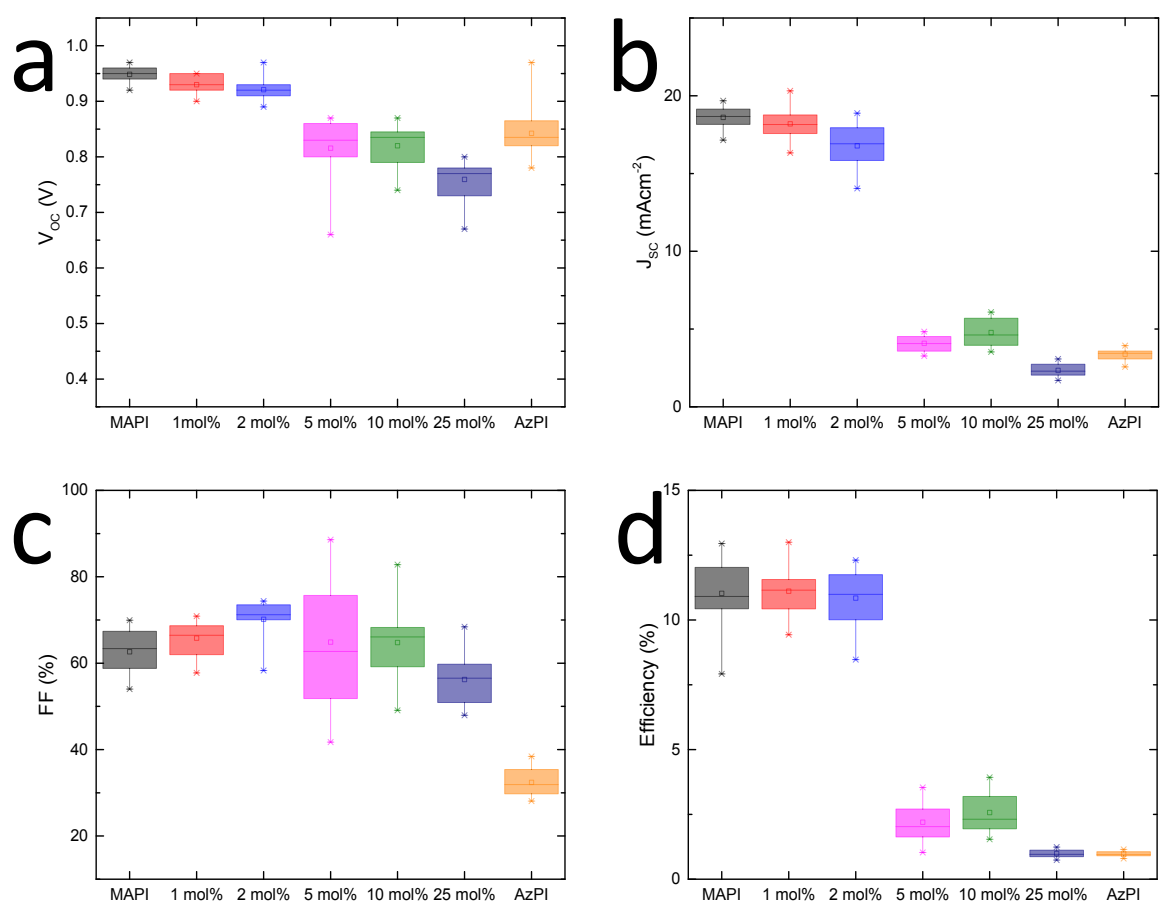

**Fig. S11** Box plots for the cell parameters of AzMAPI cells: (a)  $V_{OC}$  (b)  $J_{SC}$  (c) Fill Factor and (d) Efficiency

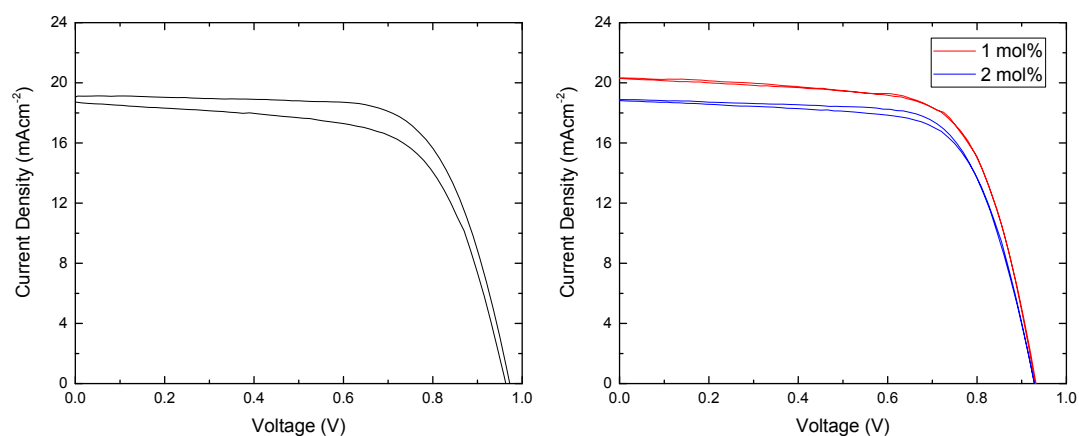

**Figure S12.** A comparison of the hysteresis in the JV curves for MAPI cells (left) and those with azetidinium additives

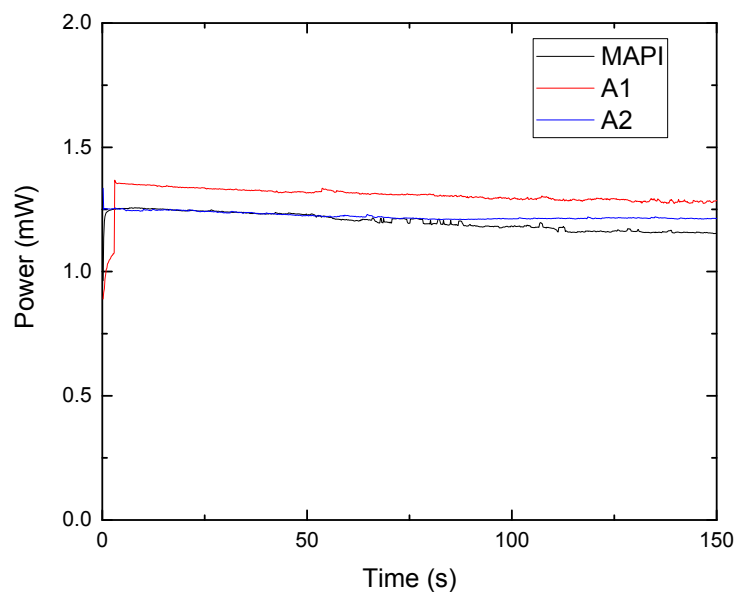

**Figure S13.** Stabilised power output measurements for the best performing AzMAPI and MAPI pixels

#### References:

- 39 M. Valiev, E.J. Bylaska, N. Govind, K. Kowalski, T.P. Straatsma, H.J.J. Van Dam, D. Wang, J. Nieplocha, E. Apra, T.L. Windus, W.A. De Jong *Comput. Phys. Commun.* 2010, **181** (9), 1477–1489.
- 40 J. Frost, K. Butler, F. Brivio, *Nano Lett.* 2014, **14** (5), 2584–2590
- 41 F. Zheng, H. Takenaka, F. Wang, N.Z. Koocher, A.M. Rappe *J. Phys. Chem. Lett.* 2015, **6** (23), 31–37.
- 42 J. Hutter, M. Iannuzzi, F. Schiffmann and J. VandeVondele, *Wiley Interdisciplinary Reviews: Computational Molecular Science*, 2014, **4**, 15–25
- 43 J. VandeVondele, M. Krack, F. Mohamed, M. Parrinello, T. Chassaing and J. Hutter, *Comput. Phys. Commun.*, 2005, **167**, 103–128.
- 44 S. Goedecker, M. Teter and J. Hutter, *Phys. Rev. B*, 1996, **54**, 1703.
- 45 J.P. Perdew, A. Ruzsinszky, G. I. Csonka, O. A. Vydrov, G. E. Scuseria, L. A. Constantin, X. Zhou, and K. Burke, *Phys. Rev. Lett.* 2009, **100**, 136406
- 46 S. Grimme, *J. Comput. Chem*, 2006, **27**, 1787–1799
